# Supplementary material for: Polydopamine-assisted deposition of heparin for selective adsorption of low-density lipoprotein
Source: Royal Society of Chemistry journal article supplement (doi:10.1039/c4ra16700g), 2015-01-01
Supplement: c4ra16700g1.pdf [file c4ra16700g1.pdf]

## Supplementary Information

### **Polydopamine-Assisted Deposition of Heparin for Selective Adsorption of Low-Density Lipoprotein**

*Yang Liu,<sup>†</sup> Wen-Ze Qiu,<sup>†</sup> Hao-Cheng Yang,<sup>†</sup> Yue-Cheng Qian,<sup>†</sup> Xiao-Jun Huang,<sup>†,\*</sup> Zhi-Kang Xu<sup>†</sup>*

<sup>†</sup> MOE Key Laboratory of Macromolecular Synthesis and Functionalization, Department of Polymer Science and Engineering, Zhejiang University, Hangzhou 310027, China

\*Corresponding author, e-mail: hxjzjh@zju.edu.cn

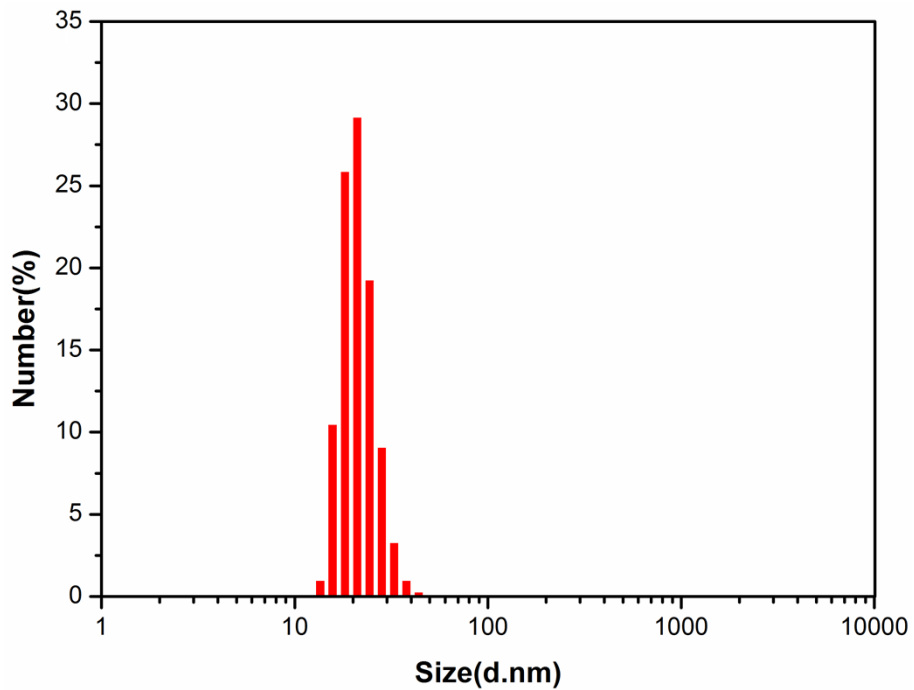

**Fig. S1** Dynamic light scattering results of size distributions of commercial LDL used in this work.

**Table S1** Size distribution of LDL obtained from Fig. S1

| Size(d.nm) | <13 | 13~18 | 18~25 | 25~80 | >80 |
|------------|-----|-------|-------|-------|-----|
| Number(%)  | 0   | 11.5  | 74.4  | 14.1  | 0   |

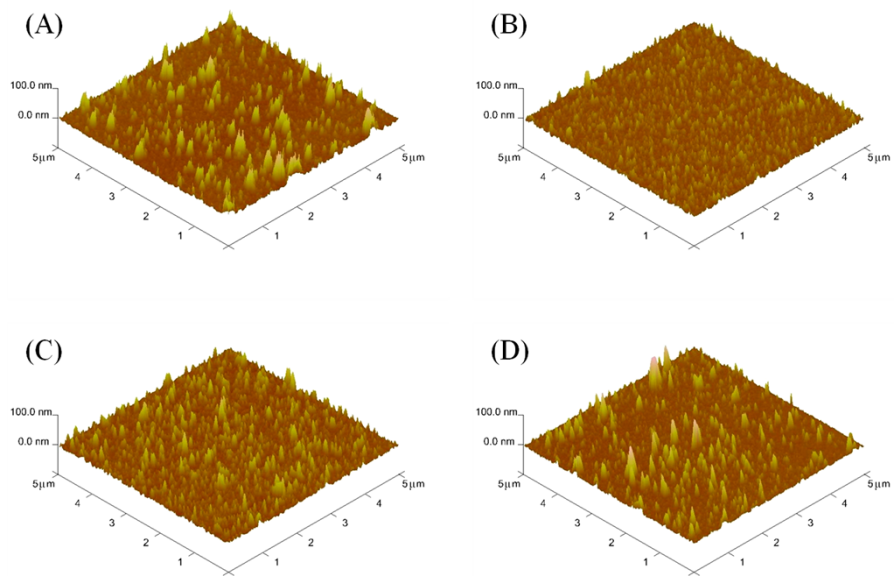

**Fig. S2** AFM images ( $5 \times 5 \mu\text{m}^2$ ) of PDA/heparin coatings in air: (A) PDA-Hep(0), (B) PDA-Hep(2), (C) PDA-Hep(5), (D) PDA-Hep(10).

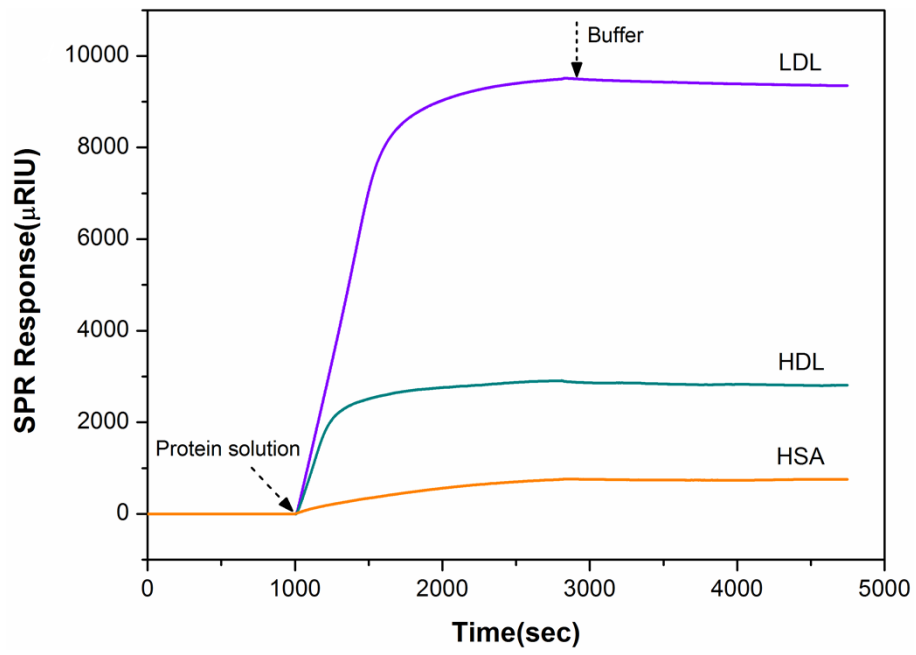

**Fig. S3** Typical SPR adsorption sensorgrams of PDA-Hep(2).

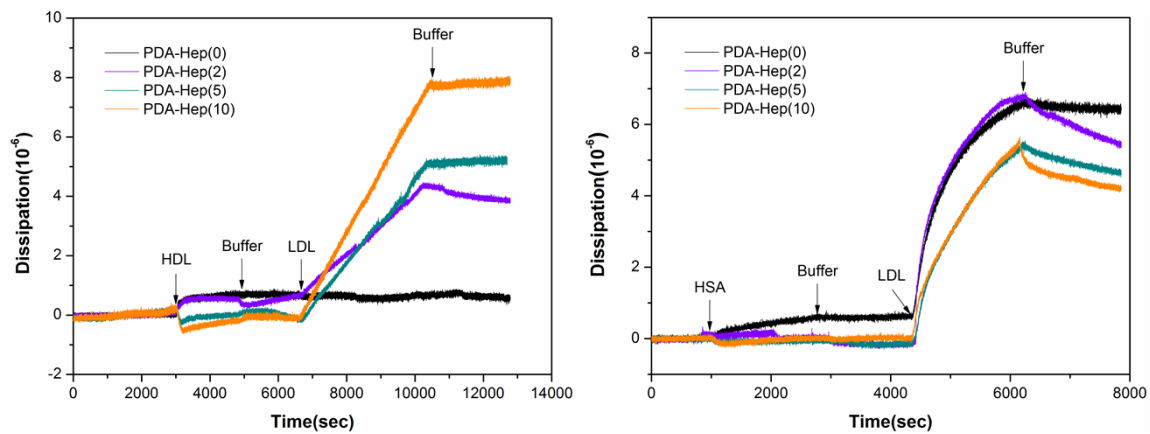

**Fig. S4** QCM dissipation when HDL (left) or HSA (right) was used as competitive protein.
